# Supplementary material for: Aging-associated distinctive DNA methylation changes of LINE-1 retrotransposons in pure cell-free DNA from human blood
Source: PubMed Central journal article supplement (PMC7746734; doi:10.1038/s41598-020-79126-z), 2020-12-17
Supplement: 41598_2020_79126_MOESM1_ESM.pdf [file 41598_2020_79126_MOESM1_ESM.pdf]

**Aging-associated distinctive DNA methylation changes of LINE-1 retrotransposons in pure cell-free DNA from human blood**

Wardah Mahmood<sup>1\*</sup>, Lars Erichsen<sup>1\*</sup>, Pauline Ott<sup>1</sup>, Wolfgang A. Schulz<sup>2</sup>, Johannes C. Fischer<sup>3</sup>, Marcos J. Arauzo-Bravo<sup>4,5</sup>, Marcelo L. Bendhack<sup>6</sup>, Mohamed Hassan<sup>7,8</sup>, Simeon Santourlidis<sup>1</sup>

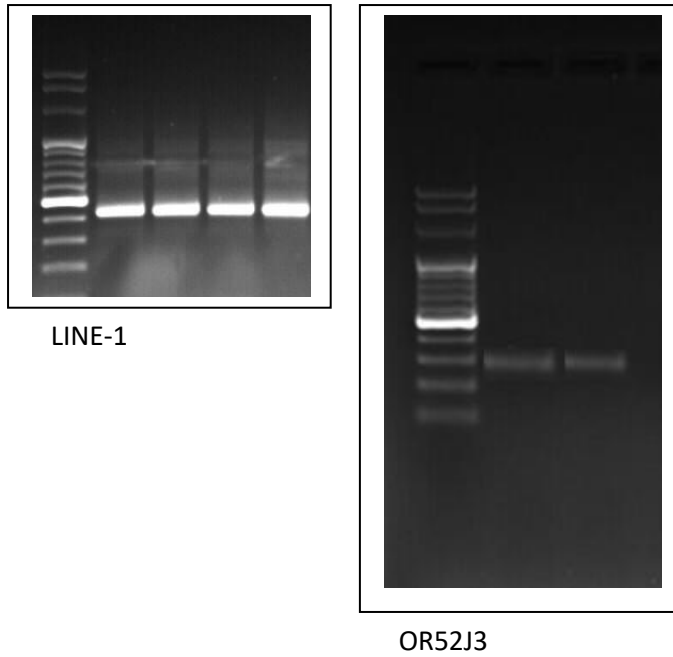

Fig. 1. Full figures corresponding to cropped figures of Fig. 2C/D of the paper.
